# Supplementary material
Source: PubMed Central journal article supplement (PMC6584058)
Supplement: NIHMS1026850-supplement-Measure.pdf [file NIHMS1026850-supplement-Measure.pdf]

## Problem Behavior Frequency Scales Version 2.0\*

We are interested in how often people your age do different kinds of things. Think about how often you have done the following things in the LAST 30 DAYS, or in about the past month. Please read each statement carefully and select the answer that is right for you. Remember, NO ONE - not your parents, teachers, the police, or anyone else will see your answers.

In the LAST 30 DAYS, how many times have you:

1 = Never; 2 = 1-2 times; 3 = 3-5 times; 4 = 6-9 times; 5 = 10-19 times; 6 = 20 or more times

1. Skipped school because you felt that you would be unsafe either at school or on your way to or from school
2. Not let someone be in your group anymore because you were mad at them
3. Spread a false rumor about someone
4. Used cell phone pictures to make fun of someone
5. Tried to keep others from liking another kid by saying mean things about him or her
6. Told someone you wouldn't like them unless they did what you wanted
7. Stolen something
8. Used text-messaging to threaten to hurt someone physically
9. Hit or slapped someone
10. Used a chat room or Internet website to make fun of someone
11. Thrown something at someone to hurt them
12. Left someone out on purpose when it was time to do an activity
13. Called someone you know mean names online like on Facebook or Snapchat or through texting.
14. Threatened to hit or physically harm someone
15. Shoved or pushed someone
16. Snuck into someplace without paying, such as a movie, or onto a bus or subway
17. Sent or posted embarrassing pictures of someone without their permission.
18. Used cell phone pictures to threaten to hurt someone physically
19. Used text-messaging to make fun of someone
20. Brought a weapon (knife or gun) to school
21. Left someone out of an online group or unfriended them on Facebook.
22. Written things or sprayed paint on (tagged) walls or sidewalks or cars where you were not supposed to
23. Posted rude comments about someone you know online.
24. Taken someone's car or motorcycle for a ride without their permission (gone "joyriding")
25. Spread rumors about someone you know online or through texting.
26. Taken something from a store without paying for it (shoplifted)
27. Been in a fight in which someone was hit
28. Pretended to be someone else online or through texting.
29. Carried a weapon (gun, knife, club, etc.)
30. Threatened someone with a weapon (gun, knife, club, etc.)

31. Been in a fight in which you were injured and had to be treated by a doctor or nurse
32. Purposely damaged property that did not belong to you
33. Smoked cigars (like Black & Milds)
34. Smoked cigarettes
35. Drunk liquor (like whiskey or vodka)
36. Drunk beer (more than a sip or taste)
37. Been drunk
38. Drunk wine or wine coolers (more than a sip or taste)
39. Used marijuana (pot, hash, reefer, K2)
40. Sniffed glue, breathed the contents of aerosol spray cans, or inhaled any paints or sprays to get high
41. Used drugs (besides marijuana or inhalants), such as heroin, cocaine, LSD, or ecstasy

The next questions are about things that may have happened to you in the LAST 30 DAYS, or in about the past month. We only want to know about when other teens or youth have done these things, not when adults have done them.

In the LAST 30 DAYS, how many times has this happened to you?

1 = Never; 2 = 1-2 times; 3 = 3-5 times; 4 = 6-9 times; 5 = 10-19 times; 6 = 20 or more times

42. Someone said something disrespectful to you about your family
43. Someone tried to keep others from liking you by saying mean things about you
44. Someone threatened to hit or physically harm you
45. Someone who was mad at you tried to get back at you by not letting you be in their group
46. Someone put you down to your face
47. Someone used cell phone pictures to make fun of you
48. Someone pushed or shoved you
49. Someone used text-messaging to threaten to hurt you physically
50. Someone threatened or injured you with a weapon (gun, knife, club, etc.)
51. Someone said they wouldn't like you unless you did what he or she wanted
52. Someone threw something at you to hurt you
53. Someone teased you to make you mad
54. Someone made fun of you to make others laugh
55. Someone used cell phone pictures to threaten to hurt you physically
56. Someone yelled at you or called you mean names
57. Someone left you out on purpose when it was time to do an activity
58. Someone spread a false rumor about you
59. Someone hit you hard enough to hurt
60. Someone used text-messaging to make fun of you
61. Someone used a chat room or Internet website to make fun of you
62. Someone sent or posted embarrassing pictures of you without your permission.
63. Someone called you mean names online or using a cell phone.

64. Someone pretended to be someone else online or using a cell phone to trick you.
65. Someone left you out of an online group or unfriended you on Facebook.
66. Someone posted rude comments about you online.
67. Someone spread rumors about you online or by texting.

\*From *Description of measures: Middle School Student Survey*. By A. D. Farrell (2016).  
Richmond, VA: Virginia Commonwealth University. Reprinted with permission.
